# Supplementary material for: Complete sequencing of a cynomolgus macaque major histocompatibility complex haplotype
Source: HighWire-hosted journal article supplement (doi:10.1101/gr.277429.122), 2023-02-28
Supplement: Supplemental_Table_S3.xlsx [file Supplemental_Table_S3.xlsx]

## Sheet: Supplemental_Table_S3
Supplemental Table S3. Assessment of the region of homozygosity flanking the MHC. SNP positions on Chromosome 4 of the Macaca_fascicularis_5.0 (GCF_000364345) assembly used to define the boundaries of homozygosity surrounding the MHC region in cy0333.
Gene	Chr 4 Position	Type	Genotype	AD
KIAA0319	145979505	HET	T/C	21,16
	145,936,780-145,936,781	HET	AT/A	19,21
	145936749	HET	C/A	25,20
	145936430	HOM_REF	G/G	36,0
TDP2	145931645	HOM_VAR	A/A	0,45
GABBR1	141230771
MHC M3 region
KIFC1	137357684
	134954517	HOM_VAR	T/T	0,43
ENSMFAG00000016485	134,954,427-134,954,431	HOM_VAR	T/T	0,33
ENSMFAG00000033486	134923149	HET	G/A	23,18
ENSMFAG00000033486	134920750	HET	C/T	27,27
