# Supplementary material for: Complete sequencing of a cynomolgus macaque major histocompatibility complex haplotype
Source: HighWire-hosted journal article supplement (doi:10.1101/gr.277429.122), 2023-02-28
Supplement: Supplemental_Table_S4.xlsx [file Supplemental_Table_S4.xlsx]

## Sheet: Supplemental_Table_S4
Supplemental Table S4. FASTQ statistics for Oxford Nanopore and PacBio HiFi sequencing data. Total number of reads obtained by each sequencing method for just the MHC region and for the whole genome are shown. Numbers of reads at or above each of the listed minimum sequence lengths for either the MHC or the whole genome are also provided.
Oxford Nanopore	MHC Region Metrics	Whole Genome Metrics
Minimum Sequence Length	Number of Sequences	Number of Sequences
All	22809	14624422
5 kb	11970	7062450
10 kb	7720	4501869
25 kb	3239	1830612
50 kb	1213	700668
100 kb	328	197078
250 kb	32	15999
500 kb	2	457
1 Mb	0	2
PacBio HiFi	MHC Region Metrics	Whole Genome Metrics
Minimum Sequence Length	Number of Sequences	Number of Sequences
All	9215	5358664
2.5 kb	9211	5355054
5 kb	8996	5209365
10 kb	7441	4260173
25 kb	848	464269
50 kb	0	1
